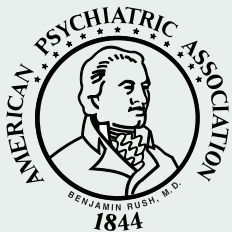

# The American Journal of Psychiatry

Official Journal of the American Psychiatric Association

## Officers 2014–2015

### President

Paul Summergrad, M.D.

### President-Elect

Renée L. Binder, M.D.

### Treasurer

Frank W. Brown, M.D.

### Secretary

Maria A. Oquendo, M.D.

### Assembly

#### Speaker

Jenny L. Boyer, M.D., Ph.D., J.D.

#### Speaker-Elect

Glenn A. Martin, M.D.

#### Recorder

Daniel J. Anzia, M.D.

### Office of the CEO and Medical Director

#### CEO and Medical Director

Saul Levin, M.D., M.P.A.

### Board of Trustees

Jeffrey Akaka, M.D.

R. Scott Benson, M.D.

Lara J. Cox, M.D., M.S.

Brian Crowley, M.D.

Anita S. Everett, M.D.

Jeffrey L. Geller, M.D., M.P.H.

Dilip V. Jeste, M.D.

Judith F. Kashtan, M.D.

Jeffrey A. Lieberman, M.D.

Molly K. McVoy, M.D.

John M. Oldham, M.D.

Vivian B. Pender, M.D.

Gail E. Robinson, M.D.

Ravi N. Shah, M.D.

Melinda Young, M.D.

## Editorial Board

### Editor

Robert Freedman, M.D.

### Deputy Editors

David A. Lewis, M.D.

Robert Michels, M.D.

Daniel S. Pine, M.D.

Susan K. Schultz, M.D.

Carol A. Tamminga, M.D.

### Associate Editors

David A. Brent, M.D.

Cameron S. Carter, M.D.

Graham J. Emslie, M.D.

Steven Hamilton, M.D., Ph.D.

Daniel C. Javitt, M.D.

Bankole Johnson, M.D.

Ellen Leibenluft, M.D.

Joan L. Luby, M.D.

Constantine G. Lyketsos, M.D., M.H.S.

Helen S. Mayberg, M.D., F.R.C.P.C.

Barbara Milrod, M.D.

Terrie E. Moffitt, Ph.D.

Maria A. Oquendo, M.D.

A. John Rush, M.D.

Larry J. Siever, M.D.

Eduard Vieta, M.D., Ph.D.

Katherine L. Wisner, M.D., M.S.

Xin Yu, M.D.

### Editor Emeritus

Nancy C. Andreasen, M.D., Ph.D.

### Former Editors

Amariah Brigham, M.D., 1844–1849

T. Romeyn Beck, M.D., 1849–1854

John P. Gray, M.D., 1854–1886

G. Alder Blumer, M.D., 1886–1894

Richard Dewey, M.D., 1894–1897

Henry M. Hurd, M.D., 1897–1904

Edward N. Brush, M.D., 1904–1931

Clarence B. Farrar, M.D., 1931–1965

Francis J. Braceland, M.D., 1965–1978

John C. Nemiah, M.D., 1978–1993

### Editorial Staff

#### Executive Editor

Michael D. Roy

#### Senior Editor/Features Writer

Jane Weaver, E.L.S.

#### Senior Editor

John J. Guardiano, Ph.D.

#### Production Manager

Susan Westrate

#### Assistant Editors

Angela Moore

Katie Duffy

#### Editorial Support Services Manager

Nicole Gray

#### Editorial Assistant

Linda LaCour

#### Editorial Assistant/Permissions Coordinator

Heidi Koch

Heidi Koch

#### Assistants to the Editors

Lois Lilienthal

Lindsay Karr

Rachel Hogg

Russell A. Scholl

### Publisher

Rebecca D. Rinehart

# There's So Much More to AJP Than Meets the Page!

Visit *The American Journal of Psychiatry's* website on PsychiatryOnline for the following features!

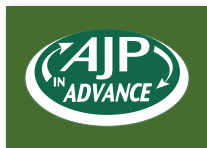

## AJP in Advance

The very latest research advances!

At **AJP in Advance**, you can discover the following before their appearance in print:

### Uncovering the Hidden Risk Architecture of the Schizophrenias

New genome-wide association study results on schizophrenia suggest that a larger proportion of underlying risk might be found by examining the ways in which specific genes interact as part of signaling pathways to create risk for particular constellations of clinical features.

### Paraprofessional-Delivered Home-Visiting Intervention for American Indian Teen Mothers and Children

Recent changes in health care may increase access to home visits designed to teach pregnant women child-care techniques that promote healthy development. At-risk mothers with extensive use of home visits demonstrated fewer signs of psychopathology, and their infants also showed lower rates of psychopathology, than mothers and their infants in the control condition.

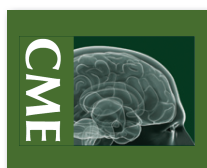

## AJP CME

Three articles in this issue form the basis of a short course with questions that can be answered for up to 1 *AMA PRA Category 1 Credit™* each by visiting <http://psychiatryonline.org/cme> and clicking on the "**American Journal of Psychiatry**" tab. CME credit is issued only **online**, and a paid subscription to AJP CME course program is required. This month's courses appear on pages 101–104.

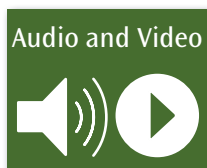

## Have You Heard?

With AJP Audio you can listen to highlights of this issue. This month, Deputy Editor Susan K. Schultz, M.D., discusses hypercalcemia and hyperparathyroidism during lithium therapy, a weight loss intervention tailored to individuals taking antipsychotic medications, the effect of socioeconomic disadvantage on outcome of collaborative depression care in OB-GYN clinics, ECT for treatment-resistant bipolar depression, ECT for clozapine-resistant schizophrenia, and the relation of an intervention for kindergartners with chronic conduct problems to psychopathology and crime at age 25.

Also, visit the online edition of this month's *Journal* to view a video of Deputy Editor Daniel S. Pine, M.D., presenting highlights from the issue.

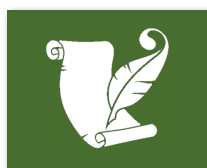

## Revisit the field's rich history!

### 75 years ago this month: "The Paucity of Arthritis Among Psychotic Cases"

Dr. Donald Gregg, on finding that "the incidence of disabling arthritis is 17 [times] greater in the community than among psychotics in Massachusetts State hospitals," speculates that because of impairments of imagination and memory, patients with psychosis may experience less muscular tension and localized ischemia than individuals without psychosis. In the discussion that follows, Dr. Karl A. Menninger suggests the possibility that human pathophysiology may be subject to a substitution effect—the "substitution of one clinical syndrome—psychiatric, clinical or whatever it is—for another."

# The Residents' JOURNAL

## THE AMERICAN JOURNAL OF PSYCHIATRY RESIDENTS' JOURNAL

December 2014

Volume 9

Issue 12

### Inside

- 2 **Mental Illness and Mass Violence**  
Ijeoma Chukwu, M.D., M.P.H.
- 3 **Mental Illness and Mass Shootings: Where Public Misperception Ends and Psychiatry Begins**  
Katherine S. Pier, M.D.
- 6 **The Insanity Defense and Violent Crimes**  
Morgyn E. Beckman, M.D.
- 9 **Not Guilty by Reason of Insanity: A Controversial Defense**  
Neeral Kamlesh Sheth, D.O.
- 11 **Urethral Self-Injury: A Case Report**  
Oliver C. Joseph, M.D.
- 13 **On the Right Side of History: Mental Health and State Violence**  
Marco A. Ramos, B.A.  
Michael D. Alpert, M.D.
- 14 **The Nazi and the Psychiatrist: Hermann Göring, Dr. Douglas M. Kelley, and a Fatal Meeting of Minds at the End of WWII**  
Review by Matthew J. Baker, D.O.
- 16 **Residents' Resources**

### In This Issue

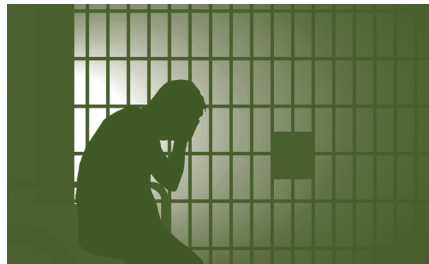

This month's issue of the *Residents' Journal* focuses on the topic of violence and mental health. In an editorial, Ijeoma Chukwu, M.D., M.P.H., provides an overview of mental illness and mass violence. In a review article, Katherine S. Pier, M.D., examines the public perception of mental illness and recent mass shootings, emphasizing the role of psychiatrists in shaping the public dialogue. Morgyn E. Beckman, M.D., explores the relationship between the insanity defense and violent crimes. Neeral Kamlesh Sheth, D.O., further assesses the not guilty by reason of insanity defense in a research article that includes historical development and forensic evaluation. In a case report, Oliver C. Joseph, M.D., discusses self-injurious behavior in a teenager with a psychiatric history of comorbid mental illnesses, who acted out violently during his hospital stay. Marco A. Ramos, B.A., and Michael D. Alpert, M.D., comment on the historical role of mental health professionals with regard to the controversial subject of state violence, highlighting the need for training based in the social sciences, such as education in military medical ethics and human rights. Lastly, Matthew J. Baker, D.O., presents his review of the book *The Nazi and the Psychiatrist: Hermann Göring, Dr. Douglas M. Kelley, and a Fatal Meeting of Minds at the End of WWII*.

Editor-in-Chief  
Misty Richards, M.D., M.S.

Senior Deputy Editor  
Rajiv Radhakrishnan, M.B.B.S., M.D.

Deputy Editor  
Tobias Wasser, M.D.

Guest Section Editor  
Ijeoma Chukwu, M.D., M.P.H.

Associate Editors  
Ijeoma Chukwu, M.D., M.P.H.  
Kathleen Mary Patchan, M.D.

Media Editor  
Holly S. Peek, M.D., M.P.H.

Staff Editor  
Angela Moore

Editors Emeriti  
Sarah B. Johnson, M.D.  
Molly McVoy, M.D.  
Joseph M. Cerimele, M.D.  
Sarah M. Fayad, M.D.  
Manifa Seawell, M.D.  
Arshya Vahabzadeh, M.D.

### Editor-in-Chief

Misty Richards, M.D., M.S.

### Senior Deputy Editor

Rajiv Radhakrishnan, M.B.B.S., M.D.

### Deputy Editor

Tobias Wasser, M.D.

### Associate Editors

Ijeoma Chukwu, M.D., M.P.H.

Kathleen Mary Patchan, M.D.

### Media Editor

Holly S. Peek, M.D., M.P.H.

*The Residents' Journal* accepts manuscripts authored by medical students, resident physicians, and fellows. To submit your paper, please visit the manuscript submission site at [mc.manuscriptcentral.com/appi-ajp](http://mc.manuscriptcentral.com/appi-ajp) and either create an account or use your existing account. For manuscript type, select "Residents." Then follow the instructions to upload your manuscript. Residents who are interested in participating as Guest Section Editors should e-mail *The Residents' Journal* Editor-in-Chief Misty Richards at [misty.richards@gmail.com](mailto:misty.richards@gmail.com).

*The Residents' Journal* is sent free-of-charge to all psychiatry residents. Anyone interested in being included on the distribution list should contact Angela Moore, *The Residents' Journal* staff editor at [ajp@psych.org](mailto:ajp@psych.org) with "Subscribe to Residents' Journal" in the subject line.

To access the complete Residents' Journal archives, visit [ajp.psychiatryonline.org/residents\\_journal.aspx](http://ajp.psychiatryonline.org/residents_journal.aspx)

# Psychiatric Services

VOLUME 66 | NUMBER 1 | JANUARY 2015

## TAKING ISSUE

### 1 Whither Borderland?

*David A. Adler, M.D.*

## ARTICLES

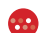

### 10 Embedding Advance Directives in Routine Care for Persons With Serious Mental Illness: Implementation Challenges

*Kathleen Kemp, Ph.D., et al.*

The Commonwealth of Virginia has launched an ambitious statewide project to implement psychiatric advance directives. Its experience may be highly instructive for other states.

### 15 Treatment Rates for Patients With Borderline Personality Disorder and Other Personality Disorders: A 16-Year Study

*Mary C. Zanarini, Ed.D., et al.*

High rates of use of several treatment modalities were documented over a long follow-up period, highlighting the severe symptoms often experienced by patients with borderline personality disorder.

### 21 Increasing Tobacco Dependence Treatment Through Continuing Education Training for Behavioral Health Professionals

*Jill M. Williams, M.D., et al.*

Random chart review of patients before and after clinicians completed intensive 2-day training in tobacco treatment services showed increased focus on tobacco dependence treatment and quit attempts.

### 27 A Prospective Study of the Associations Among Housing Status and Costs of Services in a Homeless Population

*Brian S. Fuehrlein, M.D., Ph.D., et al.*

Defying researchers' expectations, individuals who were housed for two years following a period of homelessness accrued greater service costs than individuals who remained homeless.

### 33 Health Risk Factors and Differences in Outcomes Between Younger and Older Veterans Using VA Transitional Housing

*Lisa M. Brown, Ph.D., et al.*

To improve transitional housing for homeless veterans, the VA is examining the complex health issues of older homeless veterans, a growing and vulnerable population.

### 41 Provision of Mental Health Services as a Quality Indicator for Adolescent Substance Abuse Treatment Facilities

*Rajeev Ramchand, Ph.D., et al.*

Consumers seeking substance abuse treatment for adolescents have few outcome-specific metrics for assessing treatment facilities. Whether they offer mental health services may be a key quality indicator.

### 49 Association of Mandated Language Access Programming and Quality of Care Provided by Mental Health Agencies

*Sean R. McClellan, Ph.D., and Lonnie Snowden, Ph.D.*

A study of county mental health agencies in California found no evidence that access to translators and other language assistance improved follow-up care among clients with limited English proficiency.
