# The American Journal of Psychiatry

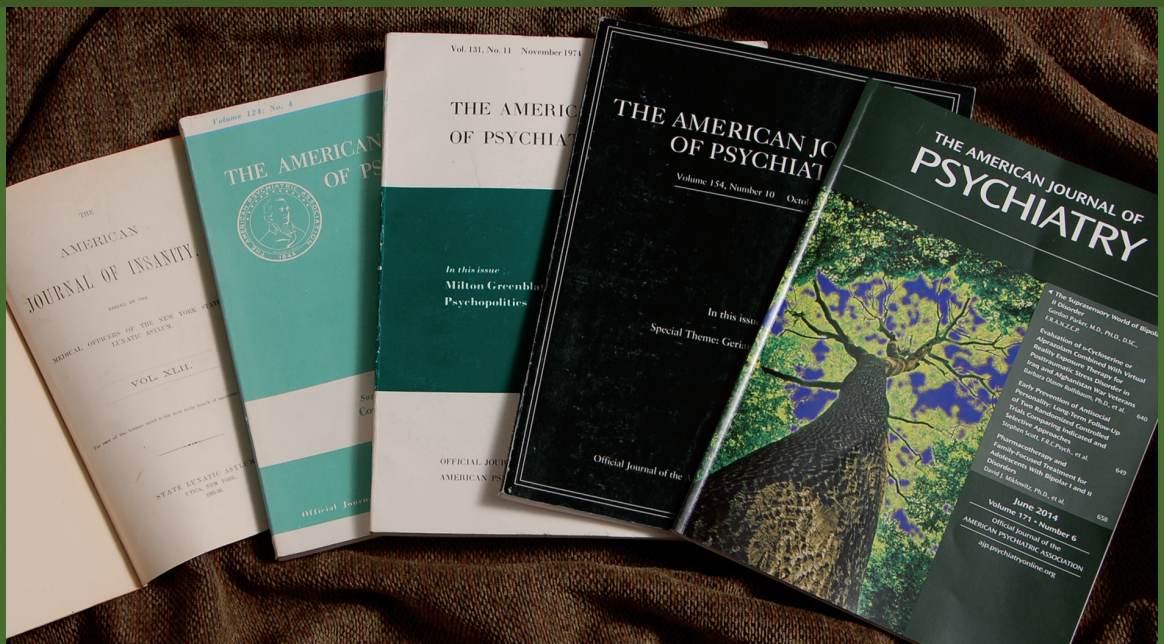

A Randomized Trial of Collaborative Depression Care in Obstetrics and Gynecology Clinics: Socioeconomic Disadvantage and Treatment Response

Treatment-Resistant Bipolar Depression: A Randomized Controlled Trial of Electroconvulsive Therapy Versus Algorithm-Based Pharmacological Treatment

Impact of Early Intervention on Psychopathology, Crime, and Well-Being at Age 25

The STRIDE Weight Loss and Lifestyle Intervention for Individuals Taking Antipsychotic Medications: A Randomized Trial
